# Supplementary material for: The bioinformatics and experimental analysis of AlkB family for prognosis and immune cell infiltration in hepatocellular carcinoma
Source: PeerJ. 2021 Sep 1;9:e12123. doi: 10.7717/peerj.12123 (PMC8418211; doi:10.7717/peerj.12123)
Supplement: Supplemental Information 5 [file peerj-09-12123-s005.xlsx]

## Sheet: 1
Fluor	Target	Content	Sample	Cq	ΔCq	ΔΔCq	2-ΔΔCq
SYBR	ALKBH1	Unkn	T1	24.2966	5.1057	-0.594303	1.50974	1.51
SYBR	ALKBH1	Unkn	T2	24.3613	4.88894	-0.811061	1.7545	1.75
SYBR	ALKBH1	Unkn	T3	22.381	4.18527	-1.51473	2.85746	2.86
SYBR	ALKBH1	Unkn	T4	23.7991	4.88208	-0.817917	1.76286	1.76
SYBR	ALKBH1	Unkn	T5	22.9894	5.06544	-0.634559	1.55246	1.55
SYBR	ALKBH1	Unkn	T6	22.9682	5.15163	-0.548366	1.46243	1.46
SYBR	ALKBH1	Unkn	T7	23.1002	3.87819	-1.82181	3.53524	3.54
SYBR	ALKBH1	Unkn	T8	24.6591	4.87523	-0.824767	1.77125	1.77
SYBR	ALKBH1	Unkn	T9	23.4814	4.69831	-1.00169	2.00234	2
SYBR	ALKBH1	Unkn	T10	23.2392	5.05439	-0.64561	1.5644	1.56
SYBR	ALKBH1	Unkn	T11	22.1166	4.97528	-0.724716	1.65258	1.65
SYBR	ALKBH1	Unkn	T12	23.9613	5.06098	-0.639016	1.55727	1.56
SYBR	ALKBH1	Unkn	T13	22.4987	5.05596	-0.644043	1.5627	1.56
SYBR	ALKBH1	Unkn	N1	24.8963	5.69807	-0.00193333	1.00134		1
SYBR	ALKBH1	Unkn	N2	23.7524	5.55353	-0.146469	1.10686		1.11
SYBR	ALKBH1	Unkn	N3	25.988	8.01984	2.31984	0.20029		0.2
SYBR	ALKBH1	Unkn	N4	23.0141	5.64872	-0.0512753	1.03618		1.04
SYBR	ALKBH1	Unkn	N5	25.6288	5.79082	0.0908153	0.938992		0.94
SYBR	ALKBH1	Unkn	N6	25.004	5.68458	-0.0154177	1.01074		1.01
SYBR	ALKBH1	Unkn	N7	23.6759	5.87606	0.176061	0.885117		0.89
SYBR	ALKBH1	Unkn	N8	23.9397	5.6127	-0.0872977	1.06238		1.06
SYBR	ALKBH1	Unkn	N9	24.5915	5.70408	0.00408474	0.997173		1
SYBR	ALKBH1	Unkn	N10	24.56	5.68187	-0.0181284	1.01264		1.01
SYBR	ALKBH1	Unkn	N11	23.0201	5.85004	0.150041	0.901225		0.9
SYBR	ALKBH1	Unkn	N12	25.5951	5.62847	-0.0715327	1.05083		1.05
SYBR	ALKBH1	Unkn	N13	23.3934	4.01096	-1.68904	3.22442		3.22
SYBR	actin	Unkn	T1	19.1909
SYBR	actin	Unkn	T2	19.4724
SYBR	actin	Unkn	T3	18.1957
SYBR	actin	Unkn	T4	18.917
SYBR	actin	Unkn	T5	17.924
SYBR	actin	Unkn	T6	17.8165
SYBR	actin	Unkn	T7	19.222
SYBR	actin	Unkn	T8	19.7838
SYBR	actin	Unkn	T9	18.7831
SYBR	actin	Unkn	T10	18.1848
SYBR	actin	Unkn	T11	17.1413
SYBR	actin	Unkn	T12	18.9003
SYBR	actin	Unkn	T13	17.4428
SYBR	actin	Unkn	N1	19.1983
SYBR	actin	Unkn	N2	18.1989
SYBR	actin	Unkn	N3	17.9682
SYBR	actin	Unkn	N4	17.3653
SYBR	actin	Unkn	N5	19.838
SYBR	actin	Unkn	N6	19.3194
SYBR	actin	Unkn	N7	17.7998
SYBR	actin	Unkn	N8	18.327
SYBR	actin	Unkn	N9	18.8874
SYBR	actin	Unkn	N10	18.8781
SYBR	actin	Unkn	N11	17.1701
SYBR	actin	Unkn	N12	19.9667
SYBR	actin	Unkn	N13	19.3824

## Sheet: 2
Fluor	Target	Content	Sample	Cq	ΔCq	ΔΔCq	2-ΔΔCq
SYBR	ALKBH2	Unkn	T1	24.3783	6.05689	0.356889	0.780847	0.78
SYBR	ALKBH2	Unkn	T2	23.7578	4.61795	-1.08205	2.11704	2.12
SYBR	ALKBH2	Unkn	T3	23.1219	4.69078	-1.00922	2.01283	2.01
SYBR	ALKBH2	Unkn	T4	22.8162	3.71289	-1.98711	3.96442	3.96
SYBR	ALKBH2	Unkn	T5	23.4488	4.54682	-1.15318	2.22403	2.22
SYBR	ALKBH2	Unkn	T6	21.9632	4.86973	-0.830268	1.77802	1.78
SYBR	ALKBH2	Unkn	T7	24.5484	4.54921	-1.15079	2.22036	2.22
SYBR	ALKBH2	Unkn	T8	23.8995	4.67666	-1.02334	2.03262	2.03
SYBR	ALKBH2	Unkn	T9	23.6886	4.69524	-1.00476	2.00661	2.01
SYBR	ALKBH2	Unkn	T10	22.6145	4.62133	-1.07867	2.1121	2.11
SYBR	ALKBH2	Unkn	T11	23.7553	4.62656	-1.07344	2.10444	2.1
SYBR	ALKBH2	Unkn	T12	23.71	4.71669	-0.983311	1.977	1.98
SYBR	ALKBH2	Unkn	T13	20.639	3.19982	-2.50018	5.65755	5.66
SYBR	ALKBH2	Unkn	N1	24.7183	5.49543	-0.204568	1.15234		1.15
SYBR	ALKBH2	Unkn	N2	23.4124	5.18955	-0.510445	1.42449		1.42
SYBR	ALKBH2	Unkn	N3	25.7204	5.72714	0.0271351	0.981367		0.98
SYBR	ALKBH2	Unkn	N4	24.9941	7.88064	2.18064	0.220577		0.22
SYBR	ALKBH2	Unkn	N5	25.66	6.5276	0.827598	0.563467		0.56
SYBR	ALKBH2	Unkn	N6	22.964	3.58577	-2.11423	4.3296		4.33
SYBR	ALKBH2	Unkn	N7	22.6999	5.27113	-0.428865	1.34617		1.35
SYBR	ALKBH2	Unkn	N8	24.5497	5.55095	-0.149051	1.10884		1.11
SYBR	ALKBH2	Unkn	N9	23.6215	5.27934	-0.420656	1.33854		1.34
SYBR	ALKBH2	Unkn	N10	24.06	5.71766	0.0176612	0.987833		0.99
SYBR	ALKBH2	Unkn	N11	23.5901	5.81143	0.111434	0.925668		0.93
SYBR	ALKBH2	Unkn	N12	25.2951	5.29638	-0.403616	1.32282		1.32
SYBR	ALKBH2	Unkn	N13	24.74	5.39768	-0.302322	1.23313		1.23
SYBR	actin	Unkn	T1	18.3215
SYBR	actin	Unkn	T2	19.1398
SYBR	actin	Unkn	T3	18.4311
SYBR	actin	Unkn	T4	19.1033
SYBR	actin	Unkn	T5	18.9019
SYBR	actin	Unkn	T6	17.0935
SYBR	actin	Unkn	T7	19.9992
SYBR	actin	Unkn	T8	19.2229
SYBR	actin	Unkn	T9	18.9933
SYBR	actin	Unkn	T10	17.9932
SYBR	actin	Unkn	T11	19.1288
SYBR	actin	Unkn	T12	18.9933
SYBR	actin	Unkn	T13	17.4392
SYBR	actin	Unkn	N1	19.2229
SYBR	actin	Unkn	N2	18.2229
SYBR	actin	Unkn	N3	19.9932
SYBR	actin	Unkn	N4	17.1134
SYBR	actin	Unkn	N5	19.1324
SYBR	actin	Unkn	N6	19.3782
SYBR	actin	Unkn	N7	17.4287
SYBR	actin	Unkn	N8	18.9988
SYBR	actin	Unkn	N9	18.3422
SYBR	actin	Unkn	N10	18.3423
SYBR	actin	Unkn	N11	17.7787
SYBR	actin	Unkn	N12	19.9987
SYBR	actin	Unkn	N13	19.3423

## Sheet: FTO
Fluor	Target	Content	Sample	Cq	ΔCq	ΔΔCq	2-ΔΔCq
SYBR	FTO	Unkn	T1	22.9413	4.61989	-1.08011	2.1142	2.11
SYBR	FTO	Unkn	T2	24.1978	5.05795	-0.64205	1.56054	1.56
SYBR	FTO	Unkn	T3	23.2319	4.80078	-0.899222	1.86506	1.87
SYBR	FTO	Unkn	T4	24.1822	5.07889	-0.621111	1.53806	1.54
SYBR	FTO	Unkn	T5	24.0988	5.19682	-0.503176	1.41733	1.42
SYBR	FTO	Unkn	T6	21.7132	4.61973	-1.08027	2.11443	2.11
SYBR	FTO	Unkn	T7	26.3184	6.31921	0.619209	0.651028	0.65
SYBR	FTO	Unkn	T8	25.4295	6.20666	0.506659	0.703851	0.7
SYBR	FTO	Unkn	T9	24.1096	5.11624	-0.583758	1.49875	1.5
SYBR	FTO	Unkn	T10	22.8645	4.87133	-0.828675	1.77605	1.78
SYBR	FTO	Unkn	T11	22.4753	3.34656	-2.35344	5.11041	5.11
SYBR	FTO	Unkn	T12	22.37	3.37669	-2.32331	5.00479	5
SYBR	FTO	Unkn	T13	21.509	4.06982	-1.63018	3.09551	3.1
SYBR	FTO	Unkn	N1	24.7683	5.54543	-0.154568	1.11309		1.11
SYBR	FTO	Unkn	N2	25.5524	7.32955	1.62955	0.323188		0.32
SYBR	FTO	Unkn	N3	23.2474	3.25414	-2.44586	5.44852		5.45
SYBR	FTO	Unkn	N4	22.0741	4.96064	-0.739357	1.66943		1.67
SYBR	FTO	Unkn	N5	23.69	4.5576	-1.1424	2.20748		2.21
SYBR	FTO	Unkn	N6	24.089	4.71077	-0.989235	1.98513		1.99
SYBR	FTO	Unkn	N7	20.9859	3.55713	-2.14287	4.41638		4.42
SYBR	FTO	Unkn	N8	24.1697	5.17095	-0.529051	1.44298		1.44
SYBR	FTO	Unkn	N9	23.1215	4.77934	-0.920656	1.89298		1.89
SYBR	FTO	Unkn	N10	22.36	4.01766	-1.68234	3.20948		3.21
SYBR	FTO	Unkn	N11	25.1901	7.41143	1.71143	0.305356		0.31
SYBR	FTO	Unkn	N12	24.3451	4.34638	-1.35362	2.55552		2.56
SYBR	FTO	Unkn	N13	24.04	4.69768	-1.00232	2.00322		2
SYBR	actin	Unkn	T1	18.3215
SYBR	actin	Unkn	T2	19.1398
SYBR	actin	Unkn	T3	18.4311
SYBR	actin	Unkn	T4	19.1033
SYBR	actin	Unkn	T5	18.9019
SYBR	actin	Unkn	T6	17.0935
SYBR	actin	Unkn	T7	19.9992
SYBR	actin	Unkn	T8	19.2229
SYBR	actin	Unkn	T9	18.9933
SYBR	actin	Unkn	T10	17.9932
SYBR	actin	Unkn	T11	19.1288
SYBR	actin	Unkn	T12	18.9933
SYBR	actin	Unkn	T13	17.4392
SYBR	actin	Unkn	N1	19.2229
SYBR	actin	Unkn	N2	18.2229
SYBR	actin	Unkn	N3	19.9932
SYBR	actin	Unkn	N4	17.1134
SYBR	actin	Unkn	N5	19.1324
SYBR	actin	Unkn	N6	19.3782
SYBR	actin	Unkn	N7	17.4287
SYBR	actin	Unkn	N8	18.9988
SYBR	actin	Unkn	N9	18.3422
SYBR	actin	Unkn	N10	18.3423
SYBR	actin	Unkn	N11	17.7787
SYBR	actin	Unkn	N12	19.9987
SYBR	actin	Unkn	N13	19.3423

## Sheet: 3
Fluor	Target	Content	Sample	Cq	ΔCq	ΔΔCq	2-ΔΔCq
SYBR	ALKBH3	Unkn	T1	21.0223	4.6992	-1.0008	2.00111	2
SYBR	ALKBH3	Unkn	T2	23.7676	4.62876	-1.07124	2.10124	2.1
SYBR	ALKBH3	Unkn	T3	23.7668	4.87805	-0.821954	1.7678	1.77
SYBR	ALKBH3	Unkn	T4	25.1725	5.17319	-0.526807	1.44074	1.44
SYBR	ALKBH3	Unkn	T5	22.3448	4.01131	-1.68869	3.22363	3.22
SYBR	ALKBH3	Unkn	T6	20.9877	3.95428	-1.74572	3.35362	3.35
SYBR	ALKBH3	Unkn	T7	22.9578	4.62437	-1.07563	2.10764	2.11
SYBR	ALKBH3	Unkn	T8	24.849	5.7322	0.0322009	0.977927	0.98
SYBR	ALKBH3	Unkn	T9	22.7793	4.54765	-1.15235	2.22275	2.22
SYBR	ALKBH3	Unkn	T10	22.8209	3.82855	-1.87145	3.65901	3.66
SYBR	ALKBH3	Unkn	T11	23.267	3.70133	-1.99867	3.99631	4
SYBR	ALKBH3	Unkn	T12	21.962	3.96757	-1.73243	3.32287	3.32
SYBR	ALKBH3	Unkn	T13	22.1512	4.71531	-0.984691	1.97889	1.98
SYBR	ALKBH3	Unkn	N1	24.2121	4.9657	-0.734303	1.66359		1.66
SYBR	ALKBH3	Unkn	N2	23.0524	4.61993	-1.08007	2.11414		2.11
SYBR	ALKBH3	Unkn	N3	25.04	6.58561	0.88561	0.541258		0.54
SYBR	ALKBH3	Unkn	N4	24.2454	6.357	0.657001	0.634195		0.63
SYBR	ALKBH3	Unkn	N5	24.064	4.77668	-0.923324	1.89648		1.9
SYBR	ALKBH3	Unkn	N6	23.9199	5.58656	-0.113445	1.08181		1.08
SYBR	ALKBH3	Unkn	N7	22.1635	5.1632	-0.536796	1.45075		1.45
SYBR	ALKBH3	Unkn	N8	22.7223	4.70404	-0.995965	1.99441		1.99
SYBR	ALKBH3	Unkn	N9	23.309	3.96661	-1.73339	3.32508		3.33
SYBR	ALKBH3	Unkn	N10	26.3113	7.96902	2.26902	0.207471		0.21
SYBR	ALKBH3	Unkn	N11	23.8433	4.75013	-0.949867	1.93169		1.93
SYBR	ALKBH3	Unkn	N12	24.1913	4.7534	-0.946596	1.92732		1.93
SYBR	ALKBH3	Unkn	N13	24.0135	4.71261	-0.98739	1.98259		1.98
SYBR	actin	Unkn	T1	16.3231
SYBR	actin	Unkn	T2	19.1389
SYBR	actin	Unkn	T3	18.8887
SYBR	actin	Unkn	T4	19.9993
SYBR	actin	Unkn	T5	18.3335
SYBR	actin	Unkn	T6	17.0334
SYBR	actin	Unkn	T7	18.3334
SYBR	actin	Unkn	T8	19.1168
SYBR	actin	Unkn	T9	18.2317
SYBR	actin	Unkn	T10	18.9923
SYBR	actin	Unkn	T11	19.5657
SYBR	actin	Unkn	T12	17.9944
SYBR	actin	Unkn	T13	17.4359
SYBR	actin	Unkn	N1	19.2464
SYBR	actin	Unkn	N2	18.4325
SYBR	actin	Unkn	N3	18.4544
SYBR	actin	Unkn	N4	17.8884
SYBR	actin	Unkn	N5	19.2873
SYBR	actin	Unkn	N6	18.3333
SYBR	actin	Unkn	N7	17.0003
SYBR	actin	Unkn	N8	18.0182
SYBR	actin	Unkn	N9	19.3424
SYBR	actin	Unkn	N10	18.3423
SYBR	actin	Unkn	N11	19.0932
SYBR	actin	Unkn	N12	19.4379
SYBR	actin	Unkn	N13	19.3009

## Sheet: 8
Fluor	Target	Content	Sample	Cq	ΔCq	ΔΔCq	2-ΔΔCq
SYBR	ALKBH8	Unkn	T1	20.9363	4.6132	-1.0868	2.12402	2.12
SYBR	ALKBH8	Unkn	T2	23.4196	4.28076	-1.41924	2.67445	2.67
SYBR	ALKBH8	Unkn	T3	23.7668	4.87805	-0.821954	1.7678	2.54
SYBR	ALKBH8	Unkn	T4	25.6925	5.69319	-0.00680709	1.00473	1
SYBR	ALKBH8	Unkn	T5	23.6298	5.29631	-0.403685	1.32288	1.32
SYBR	ALKBH8	Unkn	T6	20.4817	3.44828	-2.25172	4.7625	4.76
SYBR	ALKBH8	Unkn	T7	25.5878	7.25437	1.55437	0.340476	0.34
SYBR	ALKBH8	Unkn	T8	25.399	6.2822	0.582201	0.667944	0.67
SYBR	ALKBH8	Unkn	T9	22.7793	4.54765	-1.15235	2.22275	2.22
SYBR	ALKBH8	Unkn	T10	23.1009	4.10855	-1.59145	3.01352	3.01
SYBR	ALKBH8	Unkn	T11	25.247	5.68133	-0.0186667	1.01302	1.01
SYBR	ALKBH8	Unkn	T12	23.702	5.70757	0.00756907	0.994767	0.99
SYBR	ALKBH8	Unkn	T13	23.4912	6.05531	0.355309	0.781702	0.78
SYBR	ALKBH8	Unkn	N1	26.1121	6.8657	1.1657	0.445749		0.45
SYBR	ALKBH8	Unkn	N2	24.1324	5.69993	-7.31466e-05	1.00005		1
SYBR	ALKBH8	Unkn	N3	23.0001	4.54571	-1.15429	2.22575		2.23
SYBR	ALKBH8	Unkn	N4	25.1754	7.287	1.587	0.332863		0.33
SYBR	ALKBH8	Unkn	N5	23.571	4.28368	-1.41632	2.66905		2.67
SYBR	ALKBH8	Unkn	N6	22.7599	4.42656	-1.27344	2.41738		2.42
SYBR	ALKBH8	Unkn	N7	24.4535	7.4532	1.7532	0.296642		0.3
SYBR	ALKBH8	Unkn	N8	22.5673	4.54904	-1.15096	2.22062		2.22
SYBR	ALKBH8	Unkn	N9	25.037	5.69461	-0.00538786	1.00374		1
SYBR	ALKBH8	Unkn	N10	22.8183	4.47602	-1.22398	2.33591		2.34
SYBR	ALKBH8	Unkn	N11	24.0563	4.96313	-0.736867	1.66655		1.67
SYBR	ALKBH8	Unkn	N12	25.1113	5.6734	-0.0265958	1.01861		1.02
SYBR	ALKBH8	Unkn	N13	24.8475	5.54661	-0.15339	1.11218		1.11
SYBR	actin	Unkn	T1	16.3231
SYBR	actin	Unkn	T2	19.1389
SYBR	actin	Unkn	T3	18.8887
SYBR	actin	Unkn	T4	19.9993
SYBR	actin	Unkn	T5	18.3335
SYBR	actin	Unkn	T6	17.0334
SYBR	actin	Unkn	T7	18.3334
SYBR	actin	Unkn	T8	19.1168
SYBR	actin	Unkn	T9	18.2317
SYBR	actin	Unkn	T10	18.9923
SYBR	actin	Unkn	T11	19.5657
SYBR	actin	Unkn	T12	17.9944
SYBR	actin	Unkn	T13	17.4359
SYBR	actin	Unkn	N1	19.2464
SYBR	actin	Unkn	N2	18.4325
SYBR	actin	Unkn	N3	18.4544
SYBR	actin	Unkn	N4	17.8884
SYBR	actin	Unkn	N5	19.2873
SYBR	actin	Unkn	N6	18.3333
SYBR	actin	Unkn	N7	17.0003
SYBR	actin	Unkn	N8	18.0182
SYBR	actin	Unkn	N9	19.3424
SYBR	actin	Unkn	N10	18.3423
SYBR	actin	Unkn	N11	19.0932
SYBR	actin	Unkn	N12	19.4379
SYBR	actin	Unkn	N13	19.3009

## Sheet: 4
Fluor	Target	Content	Sample	Cq	ΔCq	ΔΔCq	2-ΔΔCq
SYBR	ALKBH4	Unkn	T1	23.0982	5.65478	-0.0452172	1.03184	1.03
SYBR	ALKBH4	Unkn	T2	23.1113	4.01124	-1.68876	3.22379	3.22
SYBR	ALKBH4	Unkn	T3	22.4833	4.69636	-1.00364	2.00505	2.01
SYBR	ALKBH4	Unkn	T4	24.669	5.67454	-0.02546	1.0178	1.02
SYBR	ALKBH4	Unkn	T5	22.3113	3.96643	-1.73357	3.32549	3.33
SYBR	ALKBH4	Unkn	T6	21.0863	4.06288	-1.63712	3.11043	3.11
SYBR	ALKBH4	Unkn	T7	22.7764	4.7665	-0.9335	1.9099	1.91
SYBR	ALKBH4	Unkn	T8	23.0197	3.83072	-1.86928	3.65351	3.65
SYBR	ALKBH4	Unkn	T9	22.9489	4.06128	-1.63872	3.11389	3.11
SYBR	ALKBH4	Unkn	T10	20.5796	3.59068	-2.10932	4.31488	4.31
SYBR	ALKBH4	Unkn	T11	23.6032	3.82534	-1.87466	3.66716	3.67
SYBR	ALKBH4	Unkn	T12	19.3179	3.31692	-2.38308	5.2165	5.22
SYBR	ALKBH4	Unkn	T13	20.6333	3.29106	-2.40894	5.31082	5.31
SYBR	ALKBH4	Unkn	N1	23.1301	4.79681	-0.903187	1.87019		1.87
SYBR	ALKBH4	Unkn	N2	23.7098	4.70999	-0.990007	1.98619		1.99
SYBR	ALKBH4	Unkn	N3	23.5893	4.70208	-0.997923	1.99712		2
SYBR	ALKBH4	Unkn	N4	23.1516	7.03978	1.33978	0.395081		0.4
SYBR	ALKBH4	Unkn	N5	24.0689	5.05894	-0.641058	1.55947		1.56
SYBR	ALKBH4	Unkn	N6	23.6831	5.59215	-0.107853	1.07762		1.08
SYBR	ALKBH4	Unkn	N7	21.7378	4.62498	-1.07502	2.10675		2.11
SYBR	ALKBH4	Unkn	N8	22.9289	4.70571	-0.994286	1.99209		1.99
SYBR	ALKBH4	Unkn	N9	21.7542	4.41043	-1.28957	2.44455		2.44
SYBR	ALKBH4	Unkn	N10	22.2728	3.96367	-1.73633	3.33186		3.33
SYBR	ALKBH4	Unkn	N11	21.6435	4.62228	-1.07772	2.1107		2.11
SYBR	ALKBH4	Unkn	N12	20.1121	3.82318	-1.87682	3.67264		3.67
SYBR	ALKBH4	Unkn	N13	24.2352	4.34724	-1.35276	2.554		2.55
SYBR	actin	Unkn	T1	17.4434
SYBR	actin	Unkn	T2	19.1001
SYBR	actin	Unkn	T3	17.7869
SYBR	actin	Unkn	T4	18.9944
SYBR	actin	Unkn	T5	18.3449
SYBR	actin	Unkn	T6	17.0234
SYBR	actin	Unkn	T7	18.0099
SYBR	actin	Unkn	T8	19.189
SYBR	actin	Unkn	T9	18.8876
SYBR	actin	Unkn	T10	16.9889
SYBR	actin	Unkn	T11	19.7779
SYBR	actin	Unkn	T12	16.001
SYBR	actin	Unkn	T13	17.3422
SYBR	actin	Unkn	N1	18.3333
SYBR	actin	Unkn	N2	18.9998
SYBR	actin	Unkn	N3	18.8872
SYBR	actin	Unkn	N4	16.1118
SYBR	actin	Unkn	N5	19.01
SYBR	actin	Unkn	N6	18.091
SYBR	actin	Unkn	N7	17.1128
SYBR	actin	Unkn	N8	18.2232
SYBR	actin	Unkn	N9	17.3438
SYBR	actin	Unkn	N10	18.3091
SYBR	actin	Unkn	N11	17.0212
SYBR	actin	Unkn	N12	16.2889
SYBR	actin	Unkn	N13	19.888

## Sheet: 7
Fluor	Target	Content	Sample	Cq	ΔCq	ΔΔCq	2-ΔΔCq
SYBR	ALKBH7	Unkn	T1	20.3562	2.91278	-2.78722	6.90297	6.9
SYBR	ALKBH7	Unkn	T2	24.2613	5.16124	-0.538756	1.45272	1.45
SYBR	ALKBH7	Unkn	T3	22.1333	4.34636	-1.35364	2.55556	2.56
SYBR	ALKBH7	Unkn	T4	22.819	3.82454	-1.87546	3.66919	3.67
SYBR	ALKBH7	Unkn	T5	21.8333	3.48843	-2.21157	4.63178	4.63
SYBR	ALKBH7	Unkn	T6	20.5733	3.54988	-2.15012	4.43863	4.44
SYBR	ALKBH7	Unkn	T7	21.6284	3.6185	-2.0815	4.23247	4.23
SYBR	ALKBH7	Unkn	T8	22.5737	3.38472	-2.31528	4.97703	4.98
SYBR	ALKBH7	Unkn	T9	22.2302	3.34257	-2.35743	5.12455	5.12
SYBR	ALKBH7	Unkn	T10	21.6016	4.61268	-1.08732	2.12479	2.12
SYBR	ALKBH7	Unkn	T11	23.5132	3.73534	-1.96466	3.90321	3.9
SYBR	ALKBH7	Unkn	T12	20.4129	4.41192	-1.28808	2.44203	2.44
SYBR	ALKBH7	Unkn	T13	20.7173	3.37506	-2.32494	5.01044	5.01
SYBR	ALKBH7	Unkn	N1	21.9221	3.58881	-2.11119	4.32047		4.32
SYBR	ALKBH7	Unkn	N2	25.7098	6.70999	1.00999	0.496549		0.5
SYBR	ALKBH7	Unkn	N3	22.9993	4.11208	-1.58792	3.00616		3.01
SYBR	ALKBH7	Unkn	N4	20.6616	4.54978	-1.15022	2.21948		2.22
SYBR	ALKBH7	Unkn	N5	23.0621	4.05214	-1.64786	3.13368		3.13
SYBR	ALKBH7	Unkn	N6	21.7131	3.62215	-2.07785	4.22178		4.22
SYBR	ALKBH7	Unkn	N7	20.8958	3.78298	-1.91702	3.77642		3.78
SYBR	ALKBH7	Unkn	N8	22.4519	4.22871	-1.47129	2.77269		2.77
SYBR	ALKBH7	Unkn	N9	22.1442	4.80043	-0.899571	1.86551		1.87
SYBR	ALKBH7	Unkn	N10	23.0228	4.71367	-0.986329	1.98114		1.98
SYBR	ALKBH7	Unkn	N11	24.031	7.00978	1.30978	0.403384		0.4
SYBR	ALKBH7	Unkn	N12	20.5121	4.22318	-1.47682	2.78334		2.78
SYBR	ALKBH7	Unkn	N13	23.5512	3.66324	-2.03676	4.10323		4.1
SYBR	actin	Unkn	T1	17.4434
SYBR	actin	Unkn	T2	19.1001
SYBR	actin	Unkn	T3	17.7869
SYBR	actin	Unkn	T4	18.9944
SYBR	actin	Unkn	T5	18.3449
SYBR	actin	Unkn	T6	17.0234
SYBR	actin	Unkn	T7	18.0099
SYBR	actin	Unkn	T8	19.189
SYBR	actin	Unkn	T9	18.8876
SYBR	actin	Unkn	T10	16.9889
SYBR	actin	Unkn	T11	19.7779
SYBR	actin	Unkn	T12	16.001
SYBR	actin	Unkn	T13	17.3422
SYBR	actin	Unkn	N1	18.3333
SYBR	actin	Unkn	N2	18.9998
SYBR	actin	Unkn	N3	18.8872
SYBR	actin	Unkn	N4	16.1118
SYBR	actin	Unkn	N5	19.01
SYBR	actin	Unkn	N6	18.091
SYBR	actin	Unkn	N7	17.1128
SYBR	actin	Unkn	N8	18.2232
SYBR	actin	Unkn	N9	17.3438
SYBR	actin	Unkn	N10	18.3091
SYBR	actin	Unkn	N11	17.0212
SYBR	actin	Unkn	N12	16.2889
SYBR	actin	Unkn	N13	19.888

## Sheet: 5
Fluor	Target	Content	Sample	Cq	ΔCq	ΔΔCq	2-ΔΔCq
SYBR	ALKBH5	Unkn	T1	24.0209	3.82871	-1.87129	3.65861	3.66
SYBR	ALKBH5	Unkn	T2	24.5079	4.01964	-1.68036	3.20507	3.21
SYBR	ALKBH5	Unkn	T3	23.5199	4.61985	-1.08015	2.11426	2.11
SYBR	ALKBH5	Unkn	T4	23.916	5.72776	0.0277616	0.980941	0.98
SYBR	ALKBH5	Unkn	T5	23.7039	4.482	-1.218	2.32624	2.33
SYBR	ALKBH5	Unkn	T6	22.2199	4.34159	-1.35841	2.56403	2.56
SYBR	ALKBH5	Unkn	T7	24.961	5.68267	-0.01733	1.01208	1.01
SYBR	ALKBH5	Unkn	T8	25.4479	5.6646	-0.0353968	1.02484	1.02
SYBR	ALKBH5	Unkn	T9	21.564	4.23502	-1.46498	2.76059	2.76
SYBR	ALKBH5	Unkn	T10	22.369	4.12657	-1.57343	2.97612	2.98
SYBR	ALKBH5	Unkn	T11	21.2901	3.86692	-1.83308	3.56296	3.56
SYBR	ALKBH5	Unkn	T12	22.307	3.96411	-1.73589	3.33085	3.33
SYBR	ALKBH5	Unkn	T13	23.0577	3.63092	-2.06908	4.19619	4.2
SYBR	ALKBH5	Unkn	N1	23.1302	3.22738	-2.47262	5.55051		5.55
SYBR	ALKBH5	Unkn	N2	23.2666	3.37662	-2.32338	5.00505		5.01
SYBR	ALKBH5	Unkn	N3	22.651	5.28402	-0.415979	1.3342		1.33
SYBR	ALKBH5	Unkn	N4	21.8467	2.84635	-2.85365	7.22825		7.23
SYBR	ALKBH5	Unkn	N5	23.6324	3.96629	-1.73371	3.32582		3.33
SYBR	ALKBH5	Unkn	N6	25.6382	6.27055	0.57055	0.67336		0.67
SYBR	ALKBH5	Unkn	N7	24.7957	7.0069	1.3069	0.404189		0.4
SYBR	ALKBH5	Unkn	N8	22.9008	4.12287	-1.57713	2.98375		2.98
SYBR	ALKBH5	Unkn	N9	22.9903	4.11053	-1.58947	3.00938		3.01
SYBR	ALKBH5	Unkn	N10	22.4039	3.87775	-1.82225	3.53632		3.54
SYBR	ALKBH5	Unkn	N11	22.8422	5.64399	-0.0560095	1.03959		1.04
SYBR	ALKBH5	Unkn	N12	24.9762	5.2975	-0.402495	1.32179		1.32
SYBR	ALKBH5	Unkn	N13	25.1752	4.79702	-0.902977	1.86992		1.87
SYBR	actin	Unkn	T1	20.1922
SYBR	actin	Unkn	T2	20.4882
SYBR	actin	Unkn	T3	18.1882
SYBR	actin	Unkn	T4	18.9
SYBR	actin	Unkn	T5	19.2219
SYBR	actin	Unkn	T6	17.8783
SYBR	actin	Unkn	T7	19.2783
SYBR	actin	Unkn	T8	19.7833
SYBR	actin	Unkn	T9	17.329
SYBR	actin	Unkn	T10	18.2424
SYBR	actin	Unkn	T11	17.4232
SYBR	actin	Unkn	T12	18.3429
SYBR	actin	Unkn	T13	19.4268
SYBR	actin	Unkn	N1	19.9028
SYBR	actin	Unkn	N2	19.89
SYBR	actin	Unkn	N3	17.367
SYBR	actin	Unkn	N4	19.0004
SYBR	actin	Unkn	N5	19.6661
SYBR	actin	Unkn	N6	19.3677
SYBR	actin	Unkn	N7	17.7888
SYBR	actin	Unkn	N8	18.7779
SYBR	actin	Unkn	N9	18.8798
SYBR	actin	Unkn	N10	18.5262
SYBR	actin	Unkn	N11	17.1982
SYBR	actin	Unkn	N12	19.6787
SYBR	actin	Unkn	N13	20.3782

## Sheet: 6
Fluor	Target	Content	Sample	Cq	ΔCq	ΔΔCq	2-ΔΔCq
SYBR	ALKBH6	Unkn	T1	24.7409	4.54871	-1.15129	2.22113	2.22
SYBR	ALKBH6	Unkn	T2	24.5979	4.10964	-1.59036	3.01124	3.01
SYBR	ALKBH6	Unkn	T3	25.1799	6.27985	0.579847	0.669035	0.67
SYBR	ALKBH6	Unkn	T4	21.935	3.74676	-1.95324	3.87243	3.87
SYBR	ALKBH6	Unkn	T5	23.3449	4.123	-1.577	2.98349	2.98
SYBR	ALKBH6	Unkn	T6	22.5039	4.62559	-1.07441	2.10586	2.11
SYBR	ALKBH6	Unkn	T7	23.831	4.55267	-1.14733	2.21504	2.22
SYBR	ALKBH6	Unkn	T8	23.8929	4.1096	-1.5904	3.01132	3.01
SYBR	ALKBH6	Unkn	T9	24.194	6.86502	1.16502	0.445958	0.45
SYBR	ALKBH6	Unkn	T10	25.549	7.30657	1.60657	0.328378	0.33
SYBR	ALKBH6	Unkn	T11	22.2713	4.84812	-0.851878	1.80485	1.8
SYBR	ALKBH6	Unkn	T12	23.127	4.78411	-0.915892	1.88674	1.89
SYBR	ALKBH6	Unkn	T13	23.9777	4.55092	-1.14908	2.21773	2.22
SYBR	ALKBH6	Unkn	N1	24.7002	4.79738	-0.902621	1.86946		1.87
SYBR	ALKBH6	Unkn	N2	24.5966	4.70662	-0.993383	1.99085		1.99
SYBR	ALKBH6	Unkn	N3	25.871	8.50402	2.80402	0.143188		0.14
SYBR	ALKBH6	Unkn	N4	24.6397	5.63935	-0.0606468	1.04293		1.04
SYBR	ALKBH6	Unkn	N5	24.6224	4.95629	-0.743709	1.67448		1.67
SYBR	ALKBH6	Unkn	N6	24.6522	5.28455	-0.41545	1.33371		1.33
SYBR	ALKBH6	Unkn	N7	22.4787	4.6899	-1.0101	2.01405		2.01
SYBR	ALKBH6	Unkn	N8	23.4008	4.62287	-1.07713	2.10983		2.11
SYBR	ALKBH6	Unkn	N9	24.5803	5.70053	0.000531346	0.999632		1
SYBR	ALKBH6	Unkn	N10	23.6339	5.10775	-0.592249	1.5076		1.51
SYBR	ALKBH6	Unkn	N11	22.5022	5.30399	-0.396009	1.31586		1.32
SYBR	ALKBH6	Unkn	N12	25.0862	5.4075	-0.292495	1.22476		1.22
SYBR	ALKBH6	Unkn	N13	26.4552	6.07702	0.377023	0.770025		0.77
SYBR	actin	Unkn	T1	20.1922
SYBR	actin	Unkn	T2	20.4882
SYBR	actin	Unkn	T3	18.1882
SYBR	actin	Unkn	T4	18.9
SYBR	actin	Unkn	T5	19.2219
SYBR	actin	Unkn	T6	17.8783
SYBR	actin	Unkn	T7	19.2783
SYBR	actin	Unkn	T8	19.7833
SYBR	actin	Unkn	T9	17.329
SYBR	actin	Unkn	T10	18.2424
SYBR	actin	Unkn	T11	17.4232
SYBR	actin	Unkn	T12	18.3429
SYBR	actin	Unkn	T13	19.4268
SYBR	actin	Unkn	N1	19.9028
SYBR	actin	Unkn	N2	19.89
SYBR	actin	Unkn	N3	17.367
SYBR	actin	Unkn	N4	19.0004
SYBR	actin	Unkn	N5	19.6661
SYBR	actin	Unkn	N6	19.3677
SYBR	actin	Unkn	N7	17.7888
SYBR	actin	Unkn	N8	18.7779
SYBR	actin	Unkn	N9	18.8798
SYBR	actin	Unkn	N10	18.5262
SYBR	actin	Unkn	N11	17.1982
SYBR	actin	Unkn	N12	19.6787
SYBR	actin	Unkn	N13	20.3782
